1 **Nocturnal Light Environments and Species Ecology: Implications for Nocturnal Color**  
2 **Vision in Forests**

3

4 Carrie C. Veilleux\*<sup>1</sup> and Molly E. Cummings<sup>2</sup>

5

6 <sup>1</sup>Department of Anthropology, University of Texas at Austin, Austin, TX 78712

7 <sup>2</sup>Section of Integrative Biology, University of Texas, Austin, TX 78712, USA

8

9 \*Corresponding Author:

10 Carrie C. Veilleux

11 Department of Anthropology

12 University of Texas at Austin

13 1 University Station C3200

14 Austin, TX 78712-0303

15 Phone: (512) 203-9760

16 Fax: (512) 471-6535

17 carrie.veilleux@utexas.edu

18

19 **Running Title:** Nocturnal Light Environments

20

21 **Key Words:** visual ecology, nocturnal color vision, light environments, rainforest, dry forest

22

## Summary

23  
24 While variation in the color of light in terrestrial diurnal and twilight environments has been well  
25 documented, relatively little work has examined the color of light in nocturnal habitats.  
26 Understanding the range and sources of variation in nocturnal light environments has important  
27 implications for nocturnal vision, particularly following recent discoveries of nocturnal color  
28 vision. In this study, we measured nocturnal irradiance in a dry forest/woodland and a rainforest  
29 in Madagascar over 34 nights. We found that a simple linear model including additive effects of  
30 lunar altitude, lunar phase and canopy openness successfully predicted total irradiance flux  
31 measurements across 242 clear sky measurements ( $r = 0.85$ ;  $p < 0.0001$ ). However, the  
32 relationship between these variables and spectral irradiance was more complex, as interactions  
33 between lunar altitude, lunar phase and canopy openness were also important predictors of  
34 spectral variation. Further, in contrast to diurnal conditions, nocturnal forests and woodlands  
35 share a yellow-green-dominant light environment with peak flux at 560 nm. To explore how  
36 nocturnal light environments influence nocturnal vision, we compared photoreceptor spectral  
37 tuning, habitat preference and diet in 32 nocturnal mammals. In many species, long-wavelength-  
38 sensitive cone spectral sensitivity matched the peak flux present in nocturnal forests and  
39 woodlands, suggesting a possible adaptation to maximize photon absorption at night. Further,  
40 controlling for phylogeny, we found that fruit/flower consumption significantly predicted short-  
41 wavelength-sensitive cone spectral tuning in nocturnal mammals ( $p = 0.002$ ). These results  
42 suggest that variation in nocturnal light environments and species ecology together influence  
43 cone spectral tuning and color vision in nocturnal mammals.

## 44 **Introduction**

45 Recent discoveries of functional color vision at low light levels among nocturnal geckos, tree  
46 frogs, bees and hawkmoths (Kelber et al., 2002; Roth and Kelber, 2004; Somanathan et al., 2008;  
47 Gomez et al., 2010) have prompted a re-evaluation of the importance of color vision for  
48 nocturnal animals. Traditionally, the low light intensities available in nocturnal environments  
49 were believed to preclude color discrimination (Walls, 1942; Ahnelt and Kolb, 2000). Recent  
50 studies, however, suggest that nocturnal color vision may be both selectively advantageous for  
51 some species and more widespread than previously believed (Kelber and Roth, 2006; Gomez et  
52 al., 2009; Müller et al., 2009). Color discrimination at nocturnal light levels may even be  
53 adaptive for some mammals. Studies of opsin genes in nocturnal primates and bats, for example,  
54 have revealed evidence of selection acting to maintain functional dichromacy in several lineages,  
55 possibly for nocturnal color discrimination (Kawamura and Kubotera, 2004; Perry et al., 2007;  
56 Zhao et al., 2009a,b). Further, recent work suggests that cone thresholds in some nocturnal  
57 mammals may extend down to dim moonlight or starlight levels (Umino et al., 2008). Because  
58 the appearance of visual targets (such as conspecifics, food, or predators) depends upon the  
59 spectral quality of ambient light as well as the target's reflective properties (Endler, 1990;  
60 Endler, 1993), an understanding of the light environments available to nocturnal animals may be  
61 instrumental in studying nocturnal color vision (Johnsen et al., 2006).

62 Endler's (1993) seminal work "The Color of Light in Forests and Its Implications"  
63 offered a detailed study of variation in diurnal light environments, forming the basis for most  
64 subsequent work on diurnal visual ecology. In contrast, variation in nocturnal light environments  
65 has not been as extensively studied. By "nocturnal light environments," we are referring strictly  
66 to the nocturnal period after the conclusion of twilight (for twilight environments, see: Munz and  
67 McFarland, 1973; Munz and McFarland, 1977; Martin, 1990; Endler, 1991; Endler, 1993; Lee  
68 and Hernandez-Andres, 2003; Johnsen et al., 2006; Sweeney et al 2011). Much of the published  
69 research on nocturnal light environments has focused on variation in light intensity. These  
70 studies reveal that light intensity at night can vary dramatically, differing by as much as eight  
71 orders of magnitude due to lunar phase, lunar altitude (height of the moon in the sky), weather,  
72 foliage density, seasonality and latitude (US Navy, 1952; Lythgoe, 1979; Pariente 1980; Martin,  
73 1990; Cummings et al., 2008; Warrant, 2008; Johnsen, 2012).

74            However, few data are currently available on spectral variation in light environments at  
75 night. Munz and McFarland (1973; 1977) and Lythgoe (1972; 1979) identified spectral  
76 differences between moonlight and starlight. While the spectral quality of moonlight resembles  
77 sunlight, starlight is “red-shifted,” with maximum irradiance displaced to longer wavelengths  
78 (Lythgoe, 1972, 1979; Munz & McFarland, 1973, 1977). Pariente (1980) identified spectral  
79 variation between lunar phases in his study of moonlight inside and outside forests in  
80 Madagascar. He found that quarter moonlight is relatively richer in wavelengths greater than 750  
81 nm (i.e. “redder”) compared to full moonlight, consistent with astronomical studies of lunar  
82 irradiance and lunar surface reflectance (Lane and Irvine, 1973; Kieffer and Stone, 2005). More  
83 recently, Johnsen et al. (2006) examined nocturnal spectral irradiance under conditions ranging  
84 from clear full moon sky in an open environment to urban locations under overcast moonless  
85 sky, with an emphasis on how these spectra differ from diurnal and twilight conditions. Their  
86 findings support previous work—under full moonlight, the spectrum was “nearly  
87 indistinguishable” from daylight, while their modeled starlight was red-shifted (Johnsen et al.,  
88 2006). Thus, current evidence suggests nocturnal light environments can vary with lunar phase,  
89 foliage density (Lythgoe, 1972; Pariente, 1980) and cloud cover (Munz and McFarland, 1973).  
90 However, a systematic study of how these variables (as well as lunar altitude) influence  
91 nocturnal light in natural forest habitats is currently lacking.

92            Studies of aquatic and diurnal terrestrial visual ecology have frequently linked  
93 photoreceptor types, photoreceptor spectral tuning or visual signaling morphology (e.g. dewlap  
94 or plumage coloration) with the spectral quality of ambient light environments (Munz and  
95 McFarland, 1973, Lythgoe, 1979; Lythgoe, 1984; Endler, 1991; Endler, 1993; Endler and Théry,  
96 1996; Chiao et al., 2000; Théry, 2001; Cummings and Partridge, 2001; Leal and Fleishman,  
97 2002; Cummings, 2007). In contrast, research examining the relationships between nocturnal  
98 light environments, nocturnal visual morphology and behavior has been relatively limited (e.g.,  
99 Osorio and Vorobyev, 2005; Johnsen et al., 2006; Melin et al., 2012). Nocturnal environments  
100 can be extremely photon-limited, exhibiting light levels that are five to nine orders of magnitude  
101 darker than daylight (Munz and McFarland, 1973; Lythgoe, 1979; Pariente, 1980). Animal visual  
102 systems only encode a fraction of the photons reaching the cornea (~55-59% in invertebrates, 5-  
103 25% in vertebrates), with photons lost at both absorption and transduction stages (Barlow et al.,  
104 1971; Lillywhite, 1977; Warrant, 2004). Consequently, nocturnal animals may experience strong

105 selective pressure to maximize photon absorption by tuning photoreceptor spectral sensitivities  
106 to the dominant wavelengths of ambient light in their preferred habitats, similar to that seen in  
107 aquatic animals (Lythgoe, 1984; Partridge and Cummings, 1999; Cummings and Partridge,  
108 2001). Additionally, changes in the spectral quality of ambient light can have a large effect on  
109 the reflectance and visibility of targets (Johnsen et al. 2006; Kelber & Roth 2006). If nocturnal  
110 habitats vary substantially in photon abundance at different wavelengths, nocturnal animals from  
111 different habitats may be expected to differ in peak cone spectral sensitivities.

112 In this study, we had three objectives: (1) to describe the range of variation in nocturnal  
113 light environments present in woodlands and forests in Madagascar, (2) to identify factors  
114 affecting intensity and spectral variation in nocturnal light environments within these habitats  
115 and (3) to explore ecological factors that may influence visual pigment spectral tuning in  
116 nocturnal vertebrates. We first measured nocturnal irradiance over 32 nights at multiple locations  
117 in an open canopy dry forest/woodland and 2 nights in a closed canopy rainforest. From these  
118 data, we examined the effects of lunar phase, lunar altitude and canopy openness on nocturnal  
119 spectral irradiance using spectral comparisons and linear mixed effects modeling. Finally, we  
120 compared photoreceptor spectral sensitivities for 40 nocturnal vertebrates with different habitat  
121 preferences and diets to further examine the relationship between nocturnal light environments,  
122 ecology and vision.

123

124

## MATERIALS AND METHODS

125

### Study sites

126 Research was conducted at two forests in Madagascar representing different habitat types:  
127 Kirindy Mitea National Park and Ranomafana National Park. Kirindy Mitea is an open canopy  
128 dry deciduous forest/succulent woodland habitat (Burgess et al., 2004). Data were collected  
129 exclusively at the Ankoasifaka (Anko) Research Station (20° 47.25' S, 44° 10.14" E) between  
130 July and September 2009. This period represents the end of the dry season when the majority of  
131 tree species have dropped their leaves (Sorg and Rohner, 1996) and thus would be expected to  
132 show the greatest contrast with closed canopy rainforests. Although Anko has no history of  
133 systematic logging, a cyclone struck the forest in January 2009 that was found to affect forest  
134 structure compared to pre-cyclone conditions (Lewis and Bannar-Martin, 2012). However, a  
135 comparison of tree size classes revealed that forest structure at Anko did not significantly differ

136 from that of other dry forests in Madagascar (Veilleux, unpublished). Ranomafana is a humid  
137 rainforest with lowland to montane forest habitats (Wright, 1992). Data were collected at the  
138 Valohoaka (Valo; 21° 17.76' S, 47° 26.35' E) and Talatakely (Tala; 21° 15.75' S, 47° 25.25' E)  
139 research sites in September and October 2009. Valo (1200 m elevation) is undisturbed primary  
140 forest (Balko and Underwood, 2005). Tala (500 m elevation) experienced logging in the late  
141 1980s and is characterized as secondary rainforest (Wright, 1992).

#### 142 **Foliage density measurements**

143 At all sites, nine 50 m transects were established 3-10 m parallel to trail systems. At 3 m  
144 distance, the trail was not visible and so had no effect on measurements of foliage density.  
145 Foliage density was measured at 10 m intervals along each transect using hemispheric  
146 photography. Photographs were taken with a Nikon Coolpix 5700 digital camera and FC-E9  
147 Nikon fisheye lens positioned on a tripod (0.89 m height). Foliage density was quantified as  
148 percent canopy openness calculated from digital photographs in Gap Light Analyzer v.2.0  
149 (Frazer et al., 1999). In the dry forest site at Anko, canopy openness ranged from 19 to 50%  
150 open, with a median canopy openness at 38%. By contrast, canopy openness in the rainforest  
151 ranged from 13 to 26% open (medians: Valo-16%, Tala-20%).

#### 152 **Nocturnal irradiance measurements**

153 We collected 532 nocturnal irradiance measurements, including 514 measurements from Anko, 8  
154 from Valo and 10 from Tala. All measurements were collected using an International Light  
155 (Peabody, MA, USA) IL1700 research radiometer and calibrated PMC271C photomultiplier  
156 detector (200-675 nm sensitivity range) positioned on a tripod (0.89 m height) with 12 narrow-  
157 bandpass interference filters (Newport Oriel Corporation, Irvine, CA, USA) positioned in a filter  
158 wheel resting on the detector. The filters had central wavelengths across the visible spectrum,  
159 full-width half maximum wavelengths of  $10\pm 2$  nm, and minimum peak transmission of 30-50%.  
160 Filter model numbers were 10BPF10- 400 nm, 10BPF10- 420 nm, 10BPF10- 430 nm, 10BPF10-  
161 440 nm, 10BPF10- 460 nm, 10BPF10- 490 nm, 10BPF10- 520 nm, 10BPF10- 540 nm,  
162 10BPF10- 560 nm, 10BPF10- 580 nm, 10BPF10- 620 nm and 10BPF10- 650 nm. Due to  
163 technical error, an additional filter (680 nm central wavelength, model #10BPF10- 680 nm) was  
164 used in place of the 650 nm filter for 90 full moon measurements at Anko. As a result, some  
165 comparisons include those 680 nm measurements. Total flux was directly measured by the  
166 IL1700 and PMC271C without any filter and recorded as the average of two measurements taken

167 consecutively. Using a LI-COR Spectral Irradiance Lamp (1800-02L) and a series of neutral  
168 density filters (one Edmund Optics 2.0 NDF, one Oriel 1.0 and two Lee 0.6 NDF filters), we  
169 calibrated the IL1700 with each of the 13 interference filters in order to convert  $\text{W}/\text{cm}^2/\text{s}$   
170 photomultiplier units into photometric units (micromoles or  $\mu\text{M}$  of photons;  $\mu\text{M}/\text{m}^2/\text{s}/\text{nm}$ ).

171 During measurement, the photomultiplier detector was pointed directly up at the sky ( $90^\circ$   
172 zenith angle) and researchers crouched below the height of the detector. Cloud cover was  
173 assessed by whether any clouds were detected when looking directly overhead (“clear” or  
174 “cloudy”). We had no means to quantify the degree of cloudiness, so we restricted most analyses  
175 of nocturnal irradiance to clear skies. However, the sky was completely overcast for three  
176 measurements at Anko, so we could compare the same three measurement locations under clear  
177 sky and complete cloudiness. The time of data collection varied nightly but always began after  
178 astronomical twilight had ended (i.e., when the sun no longer contributes to nocturnal irradiance;  
179 Martin, 1990), as determined for the latitude and longitude of the study site (USNO, 2011). At  
180 Anko and Valo, measurements occurred between 19:18 h and 00:52 h. At Tala measurement  
181 occurred between 23:51 h and 04:00 h. Using the time/date of measurement and the  
182 latitude/longitude of the study site, the position of the moon in the sky (lunar altitude) and the  
183 fraction of the lunar face illuminated (lunar fraction) were determined for each measurement  
184 from data available at the United States Naval Observatory (USNO, 2011). At Anko, nocturnal  
185 irradiance was measured over 32 nights (29 July - 8 Sept 2009). Data were collected at 10 m  
186 intervals along the nine botanical transects (54 measurement location). Each measurement  
187 location was revisited approximately every 4 nights to sample locations across a lunar cycle. At  
188 Valo and Tala, nocturnal irradiance was measured on one night each. At Tala, data were  
189 collected for 10 measurement locations on a gibbous moon night (8 Oct 2009, 3 clear, 7 cloudy).  
190 At Valo, data were collected at 12 locations on a clear crescent moon night (22 Sept 2009).  
191 However, four locations at Valo were excluded from analysis because irradiance was too low to  
192 measure with spectral filters.

### 193 **Nocturnal irradiance analyses**

194 We constructed nocturnal irradiance spectra for each observation by combining the 12 filter  
195 measurements (in photometric units ( $\mu\text{M}/\text{m}^2/\text{s}/\text{nm}$ )) and explored how lunar phase, lunar altitude,  
196 canopy openness, cloud cover and habitat type influenced spectral and intensity features of  
197 nocturnal light environments. We restricted most comparisons within the dry deciduous forest at

198 Anko to clear sky conditions ( $n=347$  measurements). Lunar fractions were grouped into lunar  
199 phases: crescent (0.01-0.39), quarter (0.40-0.69), gibbous (0.70-0.90), full (0.91-1.0). To  
200 compare the influences of these factors on the shape of the spectra independent of total flux, we  
201 normalized each observation spectrum to its own maximum flux. We then calculated the mean  
202 and standard error in subsets of the spectra under different conditions for each filter wavelength.  
203 Because there was sometimes variation between spectra at the wavelength of peak flux, this  
204 method depicts the degree of variation in spectral shape within subsets (i.e. whether the mean  
205 peak flux in a condition equals 1 or is more variable).

206 We also sought to quantify the effects of these factors (lunar phase, lunar altitude, canopy  
207 openness) on nocturnal irradiance (both intensity and spectral characteristics) using linear mixed  
208 effects modeling. We restricted analyses to subsets of data representing clear sky observations at  
209 Anko (moonlight=242 measurements, no moon=99 measurements). We defined nocturnal light  
210 in terms of total flux (in  $\text{W}/\text{cm}^2$ , as measured directly by the IL1700 and PMC271C without any  
211 filter) as well as proportional flux across different bandwidths (short-wavelengths, %SW: 400-  
212 460 nm; middle wavelengths, %MW: 490-540 nm and long wavelengths, %LW: 560-650/680  
213 nm). The spectral variables (%SW, %MW and %LW) were calculated from raw measurements  
214 ( $\text{W}/\text{cm}^2$ ) taken with the relevant filters (i.e. 400-460 for %SW) divided by the sum of  
215 measurements from all filters. We chose the spectral bandwidths to correspond to typical  
216 categories of mammalian visual pigments (S: 400-460 nm, M: 510-540 nm, L: >540 nm; Jacobs,  
217 2009). For these data, we transformed lunar fraction to a measure of “lunar phase angle”, where  
218 0 is full moon (fraction=1.0) and  $180^\circ$  is new moon (fraction=0). Because lunar irradiance  
219 exhibits a nonlinear relationship with lunar phase angle (Miller and Turner, 2009; Johnsen,  
220 2012), we interpolated the lunar phase function for each lunar phase angle using lunar phase  
221 function values at 501.2 nm from Miller and Turner (2009). Lunar altitude was also cosine-  
222 transformed for each measurement. We designated measurement location and transect as nested  
223 random effects (locations nested within transects) to prevent spatial and temporal  
224 autocorrelation.

225 We had no *a priori* expectations regarding the relative importance of interactions  
226 between the factors (cosine lunar altitude, lunar phase function, and canopy openness).  
227 Therefore, we ran the full set of possible models (including all interactions) for each nocturnal  
228 irradiance variable using the *lme4* package (Bates and Maechler, 2010) in R v.2.12.2 (R



229 Development Core Team, 2011). For each model, we used maximum likelihood estimates to  
230 determine the Akaike Information Criterion (AIC). We then calculated  $\Delta\text{AIC}$  (the difference in  
231 AIC between the best model and each of the other models), evidence ratios, and Akaike weights  
232 for the models of each nocturnal irradiance variable following Symonds and Moussalli (2011). In  
233 general, models with  $\Delta\text{AIC} < 2$  are considered “almost as good” as the best model, while  $\Delta\text{AIC}$   
234  $> 9$  have relatively little to no support (Burnham and Anderson, 2004; Burnham et al., 2011;  
235 Symonds and Moussalli, 2011). Evidence ratios and Akaike weights are alternative measures of  
236 the relative model strength that estimate how much better the best model fits the data compared  
237 to the given model and the probability that the given model is the best of competing models,  
238 respectively (Burnham and Anderson, 2002; Burnham and Anderson, 2004; Symonds and  
239 Moussalli, 2011). We also calculated the relative importance of each factor/interaction by  
240 summing the Akaike weights of all models including that factor/interaction (Burnham and  
241 Anderson, 2002). This factor weight reflects the probability that the factor/interaction is a  
242 component of the best model (Symonds and Moussalli, 2011). We chose the model with the  
243 lowest AIC value for each nocturnal irradiance variable and reran the model with restricted  
244 maximum likelihood estimates to determine the model parameters. For variables where multiple  
245 models had  $\Delta\text{AIC} < 2$ , we utilized the simplest model (fewest number of terms). We then  
246 evaluated how well the model predicted each nocturnal irradiance variable by comparing  
247 estimates predicted by the best model to that observed in the dataset.

### 248 **Nocturnal vertebrate visual pigments**

249 From the published literature, we compiled a dataset of known visual pigment peak spectral  
250 sensitivities ( $\lambda_{\text{max}}$ ), habitat preferences and diet for 40 nocturnal vertebrates across a variety of  
251 taxonomic and ecological groups (Table 1 in supplemental materials). Visual pigment spectral  
252 sensitivities were grouped into three categories based on typical mammalian photoreceptor  
253 pigment classes (Jacobs, 2009): rods, short-wavelength-sensitive (SWS) cones (including  
254 ultraviolet sensitivity: UV), and medium to long-wavelength-sensitive (LWS) cones. We  
255 restricted statistical analyses of cone pigments to placental and marsupial mammals in order to  
256 limit phylogenetic effects on spectral tuning. Most vertebrates possess four cone pigment (opsin)  
257 genes (*SWS1*, *SWS2*, *Rh2*, and *LWS*) that produce different classes of cones, including two types  
258 sensitive to shorter wavelengths (355-470 nm) and two sensitive to middle and longer  
259 wavelengths (480-570 nm; Hunt et al., 2009). In contrast, mammals have an evolutionary history

260 of nocturnality that resulted in the shared loss of *SWS2* and *Rh2* genes (Jacobs and Rowe, 2004;  
261 Hunt et al., 2009). Consequently, most nocturnal mammals have only two cone classes (SWS  
262 and LWS) derived from homologous genes (*SWS1* and *LWS*, respectively), which allows a more  
263 controlled comparison of ecological effects on spectral tuning.

264 We used a phylogenetic generalized least squares (PGLS) approach to explore the  
265 association between habitat type and dietary composition with SWS and LWS spectral tuning in  
266 nocturnal mammals ( $n=32$  species). PGLS utilizes known taxonomic relationships and branch  
267 lengths to compensate for the influence of phylogeny on trait covariation (Garland and Ives,  
268 2000). For each species, we categorized habitats as “open canopy/woodland” (including  
269 seasonally open forests, forest edges), “closed canopy” (including rainforests, cloud forests),  
270 “open/closed canopy” (if a species is present in both types), and “open” if savannah/desert. One  
271 primate (*Cheirogaleus medius*), while inhabiting seasonally open canopy deciduous forests,  
272 hibernates through the dry season and is only active in the rainy season, when the forest has a  
273 closed canopy (Fietz and Ganzhorn, 1999). This species was thus included in the “closed  
274 canopy” habitat group. We restricted PGLS analyses to species from “open canopy/woodland” or  
275 “closed canopy” habitats, excluding those from both habitats (“open/closed”). We also  
276 categorized each species depending on whether it included fruit or flower products, which  
277 advertise visually to consumers, as 10% or more of its diet (Y/N). Dietary data were collected  
278 from studies of feeding time, fecal content, or gut content (see Table S1 for references).

279 We utilized phylogenetic and branch length data from a published mammalian supertree  
280 (Bininda-Emonds et al., 2007). PGLS analyses were performed in R using *ape* (Paradis et al.,  
281 2004), *caper* (Orme et al., 2010) and *geiger* (Harmon et al., 2008) packages. We conducted  
282 separate PGLS for habitat and diet categorical factors, excluding taxa with missing values. Trees  
283 used for each analysis are presented in Figure 1 in supplemental materials. For each comparison,  
284 we also calculated Pagel’s lambda, which measures the effect of phylogeny in the data, where 0  
285 reflects no phylogenetic influence and 1 reflects a strong phylogenetic signal (Pagel, 1999,  
286 Kamilar et al., 2012). We also excluded one species (*Phodopus sungorus*) because it has SWS  
287 and LWS pigment co-expression (both pigments present in a single cone) in all cones and no  
288 functional color vision (Lukáts et al., 2002). While most mammals are dichromats (having two  
289 cone types) one nocturnal marsupial (*Setonix brachyurus*) has three cone types (Cowing et al.,  
290 2008), two of which are categorized as medium/long-wavelength-sensitive (502 nm and 538

291 nm). To account for this second cone type in PGLS analyses involving LWS pigments, *Setonix*  
 292 *brachyurus* was represented by two branches (branch length set at 0.0001).

293

294

## RESULTS

295

### Variation in nocturnal irradiance: effects on total light intensity

296

Comparisons of absolute spectra reveal that total light intensity in the open canopy dry forest at  
 297 Anko varied substantially under different nocturnal conditions. The most dramatic variation in  
 298 intensity was found with changes in lunar phase (Fig. 1A,B) and lunar altitude (Fig. 2A).

299

Average flux at 560 nm, for example, was 182 times brighter under a full moon compared to no  
 300 moon, and 7.9 times brighter than under a quarter moon. Similarly, 560 nm-flux under a full  
 301 moon at high lunar altitudes (60-90°) was 48 times brighter than that at low lunar altitudes (0.1-  
 302 29.9°). Canopy openness (Fig. 3A-C) and cloud cover (Fig. S2) also influenced light intensity at  
 303 measurement locations within Anko, albeit to a lesser degree. Further, the impact of canopy  
 304 openness on nocturnal light intensity was influenced by lunar altitude (Fig. 3A-B). Under a full  
 305 moon, more open canopy measurement locations (>45% open) were 4.4 times brighter than more  
 306 closed locations (<30% open) for average 560 nm-flux at higher lunar altitudes, but only 0.5  
 307 times brighter at lower lunar altitudes. When the moon was absent, open canopy locations were  
 308 1.5 times brighter than closed locations (Fig. 3C). Cloud cover appeared to have the smallest  
 309 impact on light intensity (Fig. S2).

310

To quantify the effects of lunar phase function, cosine lunar altitude and canopy openness  
 311 on nocturnal irradiance, we ran linear mixed models on 242 clear sky moonlight observations at  
 312 the dry forest site of Anko. The factor weights for each potential model term are presented in  
 313 Table 1, while model comparisons (AIC,  $\Delta$ AIC, evidence ratios, Akaike weights) are  
 314 summarized in Table S2. The best model explaining variation in log total flux was the simple  
 315 main factor additive model:

316

$$\text{LogTotalFlux} = -9.121 - 2.11A + 0.822P + 1.627C$$

317

318

Where *A* is cosine lunar altitude, *P* is lunar phase function, and *C* is fraction canopy openness  
 319 (model parameters and factor *p*-values: Table S3). The log total flux values predicted by this  
 320 model were strongly correlated ( $r=0.85$ ,  $p<0.0001$ ) with observed values at Anko (Fig. 5A),

321

although the model was not as good at prediction at higher light intensities. Values predicted by

322 this model for the rainforest measurements were also significantly correlated with observed  
323 rainforest log total flux,  $r=0.61$ ,  $p=0.007$  (Fig. 5A), despite small rainforest sample size ( $n=18$ )  
324 and cloud cover. Comparisons of models and model weights indicates that lunar altitude had the  
325 strongest effect (Table S2), as exclusion of this factor resulted in a  $\Delta\text{AIC} = 268.8$ , suggesting the  
326 best model was more than 70 billion times better supported (Burnham et al., 2011). By contrast,  
327  $\Delta\text{AIC}$  for the highest ranked model excluding lunar phase function was 73.4, while that  
328 excluding canopy openness was only 7.1 (Table S2). Interactions between the main factors  
329 (altitude, phase and canopy) appear to play a minor role in predicting nocturnal intensity, as the  
330 factor weights for these interactions were relatively low (Table 1). Interestingly, linear mixed  
331 model estimations for nocturnal intensity under starlight at Anko ( $n=99$  measurements; with  
332 canopy openness as the factor) did not have as strong explanatory power. Although canopy  
333 openness was significantly related to log total flux (Table S3), the correlation between predicted  
334 and observed values under starlight were not as strong as under moonlight,  $r=0.50$ ,  $p<0.0001$ .  
335 Canopy openness thus explained only 25% of the variation in log total flux when the moon was  
336 not present.

### 337 **Variation in nocturnal irradiance: effects on spectral quality**

338 While total intensity varied greatly under different nocturnal conditions, spectral  
339 irradiance measurements reveal that the wavelength of maximum flux (560 nm) was relatively  
340 consistent across most conditions, microhabitats, and habitat types (Figs 1-4, S2), suggesting that  
341 light environments in nocturnal forest and woodlands generally resemble Endler's (1993)  
342 yellow/green-rich *forest shade* light environment. However, lunar phase, lunar altitude, canopy  
343 openness and cloud cover all exhibited some influence on the nocturnal spectral distribution in  
344 the dry forest/woodland at Anko (Figs 1-3, S1). In general, the spectra from full and quarter  
345 moons were richer in shorter and middle wavelengths (430-540 nm) compared to "no moon"  
346 conditions (Fig. 1C). Spectra under "no moon" conditions were slightly richer in the longest  
347 wavelengths measured (650 nm) than moonlight (Fig. 1C), as would be expected considering the  
348 "red-shift" of starlight (Lythgoe, 1979; Johnsen et al., 2006). Controlling for lunar phase, light  
349 environments from lower lunar altitudes ( $<60^\circ$ ) were richer in shorter and middle wavelengths  
350 (430-560 nm) compared to those when the moon was high in the sky (Fig. 2B). Additionally, as  
351 with light intensity, lunar altitude influenced the effect of canopy openness on nocturnal  
352 irradiance spectra. While light environments from more open microhabitats at Anko ( $>30\%$

353 open) were richer in shorter and middle wavelengths (430-540 nm) compared to more closed  
 354 microhabitats (<30% open) when the moon was low in the sky, this variation was reduced at  
 355 higher lunar altitudes (Fig. 3D,E). Under starlight, closed microhabitats deviated from the green-  
 356 rich night sky of more open locations with a spectral irradiance peak at 650 nm (Fig. 3C,F).

357 While the simplest linear mixed model was the best for explaining variation in log total  
 358 flux in clear moonlit skies, the best-fit models for the spectral quality aspects of nocturnal  
 359 irradiance (%SW:400-460 nm, %MW: 490-540 nm, %LW: 560-650/680 nm) were more  
 360 complex. For both %SW and %LW, the best models included interactions between cosine lunar  
 361 altitude and lunar phase function and cosine lunar altitude and canopy openness (Tables 1, S2):

$$362 \quad \%SW = 52 - 24.33A - 5.67P - 30.04C + 17.62AP + 65.34AC$$

$$363 \quad \%LW = 12.59 + 25.64A + 8.89P + 22.01C - 19.48AP - 53.44AC$$

364  
 365 (model parameters and *p*-values: Table S3). Although several models were close in AIC for  
 366 %MW, the best model was the most complex, including interactions between all main factors:

$$367 \quad \%MW = 53.35 - 23.61A - 39.77P - 36.68C + 48.08AP + 91.18AC + 43.63PC - 114.73APC$$

368 In addition to being more complex, the spectral quality models were also less explanatory than  
 369 the log total flux model (Fig. 4). The model for %SW performed best of the spectral variables  
 370 ( $r=0.65$ , Fig. 4B), followed by %LW ( $r=0.56$ , Fig. 4D) and %MW ( $r=0.48$ , Fig.4C). For the  
 371 rainforest dataset, the models generally performed poorly in predicting spectral distribution. For  
 372 both %SW and %MW, correlations for predicted and observed values were not significant,  
 373  $r=0.25$ ,  $p=0.31$  and  $r=0.25$ ,  $p=0.32$ , respectively. The %LW model performed much better,  
 374  $r=0.61$ ,  $p=0.008$ . Similar to the results of moonlight analyses, the models for spectral quality in  
 375 starlight (Table S3) had relatively low explanatory power. The strength of the correlations for  
 376 observed and expected values of %SW ( $r=0.61$ ,  $df=97$ ,  $p<0.0001$ ) and %LW ( $r=0.55$ ,  $df=97$ ,  
 377  $p<0.0001$ ) were similar to those of moonlight models (Fig. 5B,D), but were worse for %MW  
 378 values ( $r=0.36$ ,  $df=97$   $p=0.0002$ ).

### 379 **Variation in nocturnal irradiance: effects of habitat type**

380 Comparisons of nocturnal spectra between the dry forest/woodland at Anko and the  
 381 rainforest sites (Valo and Tala) suggest habitat differences in nocturnal light environments (Fig.  
 382 5). Absolute nocturnal irradiance at both rainforest sites was substantially lower than at Anko

383 (Fig. 5A,B). In particular, absolute irradiance in the rainforest in crescent moonlight (with lunar  
 384 altitudes of 6.4 to 28.5°; Fig. 5A) was even lower than starlight irradiance in the dry forest (Fig.  
 385 1B). In crescent moonlight (Fig. 5C), the dry forest was substantially richer in shorter and middle  
 386 wavelengths (420-520 nm) while the rainforest was richer in the longest wavelength measured  
 387 (650 nm). Similarly, in gibbous moonlight (Fig. 5D), the dry forest was richer in shorter and  
 388 middle wavelengths (420-560 nm) while the rainforest was richer in longer wavelengths (580-  
 389 650 nm). Some of this variation between habitats may be due to differences in canopy openness,  
 390 as all of the dry forest spectra in these comparisons were from relatively open canopied locations  
 391 (> 37% canopy openness) compared to Valo (14 to 21.3%) and Tala (15 to 22%). The spectra  
 392 from the rainforest sites resemble that of more closed canopy Anko locations (Fig. 3) in lacking a  
 393 secondary peak at 490 nm. However, in contrast to the closed canopy Anko locations under  
 394 moonlight, both rainforest sites both exhibited an increase in the longer wavelengths at 650 nm.  
 395 This increase in the longer wavelengths in the closed canopy rainforest sites resembles that seen  
 396 in starlight at Anko closed canopy locations (Fig. 3C,E).

### 397 **Ecological effects on nocturnal visual pigments**

398 In our comparison of nocturnal vertebrate visual pigments (Table S1, Fig. 6), we found that rod  
 399  $\lambda_{\max}$  is fairly constant (498-507 nm) across major groups. However, there was substantial  
 400 variation in cone pigment  $\lambda_{\max}$ . We found a wide range of SWS cone  $\lambda_{\max}$  in nocturnal  
 401 vertebrates (358-467 nm). In particular, ultraviolet-sensitive SWS cones (358-366 nm) were very  
 402 common among nocturnal mammals and reptiles. Among mammals, SWS cone loss was also  
 403 fairly common across taxonomic groups (Fig. 6). In contrast to SWS cones, the range of  $\lambda_{\max}$  for  
 404 LWS cones (502-562 nm) was more limited. Additionally, while most species had either one or  
 405 two cones, several had three cones (particularly non-mammals), raising the possibility of  
 406 trichromatic nocturnal color vision in several vertebrate groups (Fig. 6).

407 PGLS analyses identified a strong phylogenetic signal in mammalian SWS and LWS  
 408 spectral tuning (Table 2). Despite a strong influence of phylogeny, we still detected a significant  
 409 effect of fruit/flower consumption on mammalian SWS  $\lambda_{\max}$  (Table 2, Fig. 6). This result  
 410 suggests that in our small sample of nocturnal mammals ( $n=31$ ), controlling for phylogeny,  
 411 species that include fruit or flower products as >10% of their diets had SWS cones tuned to  
 412 shorter wavelengths than those that do not. In contrast, habitat type (open canopy forest *vs.*  
 413 closed canopy forest) had no effect on SWS spectral tuning. Similarly, both diet and habitat type

414 did not influence LWS pigment spectral tuning in our nocturnal mammal sample. Interestingly,  
415 in the LWS analysis for habitat, there was no phylogenetic signal ( $\lambda=0$ ) for the habitat  
416 subset of species (Table 2, Fig. S1).

417

418

## DISCUSSION

419

### Effects on variation in nocturnal irradiance in Madagascar

420 Measurements of the Malagasy night sky revealed that the total intensity of nocturnal light varies  
421 significantly both spatially over the landscape (canopy openness) and temporally over a night  
422 (lunar altitude), month (lunar phase) and year (dry vs wet season). Consistent with previous  
423 research, lunar phase exhibited the strongest influence on the total intensity of nocturnal light  
424 when comparing full moon vs. no moon present (Lythgoe, 1979; Pariente, 1980; Warrant, 2004;  
425 Johnsen et al. 2006; Warrant, 2008). However, once the moon was up, the height of the moon in  
426 the sky actually exhibited a much stronger effect on total intensity than lunar phase or canopy  
427 openness. While other researchers have documented an effect of lunar altitude on light intensity  
428 (e.g. Bidlingmayer 1964; Young and Mencher, 1980; Martin, 1990; Johnsen, 2012), to our  
429 knowledge, this is the first study to quantify the relative significance of lunar altitude on  
430 variation in nocturnal light intensity in natural forest environments. Further, we discovered that a  
431 simple additive model of the effects of lunar altitude, lunar phase, and canopy openness on total  
432 flux had strong predictive power in clear moonlit skies. The lower predictive power of the model  
433 for starlight conditions (only including canopy openness as a factor) may be due to the effects of  
434 other influences on intensity in moonless nights, such as zodiacal light or airglow (Johnsen,  
435 2012).

436

437

438

439

440

441

442

443

444

In contrast to the dramatic changes in total intensity, the spectral quality of nocturnal  
irradiance was fairly constant across most conditions, exhibiting a yellow-green-dominant light  
environment with a peak flux at 560 nm. These nocturnal spectral irradiance measurements  
differed from those collected in non-forested regions in other geographic areas that do not show  
a dominant peak at 560 nm for moonlit nights (McFarland et al., 1973; Johnson et al., 2006;  
Melin et al., 2012). The dominant yellow-green spectral irradiance of nocturnal skies in  
Malagasy forests under both moonlit and moonless nights suggests that the surrounding green  
foliage in these habitats may have a significant influence on spectral irradiance. Our findings  
diverge from observations in diurnal forests (Endler, 1993), which identified substantial variation

445 in peak flux with canopy openness (e.g. blue-rich *woodland shade* vs. green-rich *forest shade*).  
446 Instead, regardless of lunar altitude, lunar phase, moon presence or canopy openness, most  
447 measurements in both the open canopy dry forest/woodland and closed canopy rainforest shared  
448 a spectral distribution similar to that of the green *forest-shade* conditions in diurnal terrestrial  
449 forests (Endler, 1993). The difference between nocturnal and diurnal forest light environments  
450 (particularly the dropout of shorter wavelengths in nocturnal open canopy woodland  
451 environments and constant 560-nm flux across nocturnal conditions) may be due to the  
452 significant variation in the intensity of light sources by day and by night. By day, the intensity of  
453 the blue sky (which is a major contributor to the blue-dominant open canopy *woodland shade*  
454 environments) is five orders of magnitude dimmer than sunlight, but still an order of magnitude  
455 brighter than vegetation (Endler, 1993). While the effect of Rayleigh scattering is comparable  
456 between moonlight and sunlight (resulting in similar blue skies: Shaw, 2005), full moonlight is  
457 5-6 orders of magnitude dimmer than sunlight (Lythgoe, 1979; Pariente, 1980; Warrant, 2008).  
458 Hence, the contribution of blue skies to forest light environments is likely to be reduced under  
459 nocturnal conditions, although possibly still relevant for nocturnal animals with highly sensitive  
460 visual systems, such as hawkmoths (Kelber et al., 2002).

461 While the much dimmer intensity of nocturnal light sources resulted in a shared light  
462 environment across nocturnal woodlands and forests, comparisons of spectra and bandwidth  
463 (%SW, %MW, %LW) modeling still identified spectral effects of lunar altitude, lunar phase and  
464 canopy openness within this broad yellow-green dominant environment. Many of these effects  
465 are comparable to those seen diurnally, albeit at a much lower magnitude. By both day and night,  
466 for example, increased canopy openness is associated with relative increase in shorter  
467 wavelengths (day: Endler, 1993). Similarly, lower lunar or solar altitudes generally result in a  
468 relative enrichment in shorter wavelengths (day: Condit and Grum, 1964). The models for  
469 predicting spectral quality were complex, involving multiple interactions, and had reduced  
470 predictive power compared to that for total flux. Yet as with total flux, the models for moonlit  
471 skies revealed that lunar altitude was one of the most important factors for spectral variation  
472 (both as a main effect and in interaction with lunar phase and canopy openness), suggesting  
473 again that lunar altitude may be more important for understanding nocturnal light environments  
474 than previously identified.

#### 475 **Target detection and spectral tuning in nocturnal light environments**



476 Of the 32 nocturnal mammals sampled, 10 were monochromats (possessing only LWS cones),  
477 21 were dichromats (possessing both LWS and SWS cones), and 1 was a trichromat (possessing  
478 two LWS cone types and SWS cones). Whether monochromat, dichromat, or trichromat, most of  
479 the nocturnal mammals in this survey exhibited LWS  $\lambda_{\max}$  values clustered around 550 nm,  
480 which is near the peak flux we identified in nocturnal woodland and forest habitats (Fig. 6). We  
481 observed no significant variation among mammals in SWS or LWS cone  $\lambda_{\max}$  with habitat type,  
482 which is not surprising given that lack of measured spectral variation in nocturnal irradiance  
483 based on canopy cover or habitat type (Fig. 3,5). Some researchers have predicted that  $\lambda_{\max}$   
484 should be lower in animals using cones in dim light in order to minimize noise caused by thermal  
485 isomerization (Osorio and Vorobyev, 2005). However, the match between LWS  $\lambda_{\max}$  and  
486 nocturnal light environment suggests that many nocturnal mammals may be tuning their LWS  
487 visual pigments to maximize photon absorption to the ambient light available at night. This is not  
488 unlike many dichromatic fish that inhabit intensity-limited environments and contain LWS cones  
489 tightly matched to the sidewelling irradiance spectrum (Levine and MacNichol, 1979; Bowmaker  
490 et al., 1994; Cummings and Partridge, 2001). Unfortunately, the limited data available for other  
491 nocturnal vertebrate groups prevents discussion of ecological effects on nocturnal bird or lizard  
492 visual pigments.

493 While the LWS cones in many nocturnal mammals exhibit apparent spectral tuning for  
494 the dominant light field characteristics of nocturnal forests, the SWS cones of the nocturnal  
495 mammals in this study exhibited a strong association with foraging target. Although sample size  
496 was fairly low, our phylogenetically-corrected analyses revealed that nocturnal mammals that  
497 consume fruit or flower products have shorter SWS cone  $\lambda_{\max}$  values than those that do not (Fig.  
498 6). This foraging target-dependent variation in SWS  $\lambda_{\max}$  values among nocturnal mammals  
499 suggests that target-based spectral tuning may be occurring. In diurnal terrestrial animals, cone  
500 spectral tuning is often related to detecting targets against background radiance (such as red fruit  
501 against green foliage: Sumner and Mollon, 2000), and not irradiance directly (Fleishman et al.,  
502 1997; Leal and Fleishman, 2002; Osorio and Vorobyev, 2005). Furthermore, in diurnal aquatic  
503 animals, the variation in the SWS cones is often linked to target detection as well (McFarland  
504 and Munz, 1975; Cummings, 2007).

505 Whether this target detection in nocturnal mammals is mediated via an achromatic or  
506 chromatic channel is entirely unclear. Nocturnal color vision has been documented in frogs

507 (Gomez et al., 2010), geckos (Roth and Kelber, 2004), and insects (Kelber et al., 2002;  
508 Somanathan et al., 2008), however, its feasibility among mammals is still hotly debated. Some  
509 researchers suggest that color discrimination at night may be a physiological reality for certain  
510 species (Perry et al., 2007; Warrant, 2008; Müller et al., 2009; Zhao et al., 2009a; Zhao et al.,  
511 2009b; Melin et al., 2012), whereas others view it as unlikely (Ahnelt and Kolb, 2000; Wang et  
512 al., 2004). Although the understory of closed canopy rainforests is likely too dim for color vision  
513 at night (particularly at smaller lunar phases and low lunar altitude), the higher nocturnal light  
514 intensities available in more open canopy habitats/microhabitats (Table S4) may be bright  
515 enough to permit nocturnal color vision. Interestingly, both diurnal humans and arrhythmic  
516 horses can make color discriminations in moonlight, despite lacking nocturnal visual systems  
517 (Roth et al., 2008), suggesting that nocturnally-adapted mammals may have similar abilities (at  
518 least at moonlight levels). Under nearly all conditions in forests and woodlands, nocturnal light  
519 environments exhibited a general yellow-green peak flux. However, lunar altitude, lunar phase  
520 and canopy openness all substantially influenced the intensity of nocturnal light environments as  
521 well as the availability of shorter and longer wavelengths. Nocturnal animals thus encounter  
522 changing visual environments at temporal and spatial scales, particularly in seasonally deciduous  
523 forests. Kelber and colleagues have recently argued that nocturnal color vision may be  
524 advantageous in changing light environments in some nocturnal vertebrates (Kelber et al., 2002;  
525 Kelber et al., 2003; Johnsen et al., 2006; Kelber and Roth, 2006; Kelber and Lind, 2010; Kelber  
526 and Osorio, 2010). Similar arguments for the selective advantage of using color vision rather  
527 than achromatic cues in conditions that exhibit great spatial and temporal fluctuations in intensity  
528 have been made for terrestrial forests (Mollon, 1989) and aquatic forests (Cummings, 2004) in  
529 diurnal conditions. While the achromatic contrast of a target against a green leaf background can  
530 change dramatically under different illuminants, the chromatic contrast is much less variable and  
531 permits more reliable object discrimination (Mollon, 1989; Cummings, 2004; Johnsen et al.,  
532 2006). The results of our study of nocturnal light in forests confirm that nocturnal light  
533 environments can change rapidly (Johnsen et al., 2006), not only as the moon rises and sets, but  
534 as it travels across the sky.

### 535 **Conclusions**

536 Although many studies have investigated the spectral composition of irradiance in diurnal and  
537 twilight conditions (Munz and McFarland, 1973; Lythgoe, 1979; Endler, 1991; Endler, 1993;

538 Johnsen et al., 2006), very few have examined nocturnal light. Thus, this study offers the first  
 539 comprehensive examination of the color of light in nocturnal forests and woodlands. While lunar  
 540 phase and canopy openness were important predictors of nocturnal light environment, we found  
 541 that the height of the moon in the sky had one of the strongest effects on both the intensity and  
 542 spectral quality of nocturnal irradiance. In contrast to diurnal conditions, the much lower  
 543 intensity of nocturnal light sources resulted in a yellow-green-rich nocturnal light environment  
 544 that was generally constant across lunar phase, lunar altitude, microhabitat, and habitat type.  
 545 However, we also identified temporal and spatial variation in light intensity and the availability  
 546 of shorter and longer wavelengths within this general *nocturnal forest* light environment. We  
 547 propose that this variation may have important implications for nocturnal vision and the  
 548 appearance of visual targets. A metanalysis of visual pigments in nocturnal mammals suggests  
 549 that LWS visual pigments may be tuned to maximize photon absorption in nocturnal light  
 550 environments. Further, we found that fruit/flower detection may be involved in SWS spectral  
 551 tuning. The results of this study suggest that nocturnal light environments and ecology may offer  
 552 fertile ground for exploring variation in nocturnal visual systems, even within nocturnal  
 553 mammals.

#### 554 **LIST OF SYMBOLS AND ABBREVIATIONS**

556 Anko – Ankoasifaka Research Station, Kirindy Mitea National Park, Madagascar  
 557 Tala – Talatakely, Ranomafana National Park, Madagascar  
 558 Valo – Valohoaka, Ranomafana National Park, Madagascar  
 559  $\mu\text{M}$  – micromoles (photometric unit:  $\mu\text{M}/\text{m}^2/\text{s}/\text{nm}$ )  
 560 AIC – Akaike Information Criterion  
 561 PGLS – phylogenetic generalized least squares  
 562 %SW - Percent short wavelength irradiance measured with filters (400-460 nm)  
 563 %MW –Percent middle wavelength irradiance measured with filters (490-540 nm)  
 564 %LW – Percent long wavelength irradiance measured with filters (560-650/680 nm)  
 565  $\lambda_{\text{max}}$  – peak spectral sensitivity of visual pigment  
 566 SWS –short-wavelength-sensitive cones  
 567 LWS –long-wavelength-sensitive cones  
 568

569 **ACKNOWLEDGEMENTS**  
 570 We would like to thank C. Kirk, R. Lewis, L. Shapiro, D. Bolnick, G. Russo and two anonymous  
 571 reviewers for advice and comments on previous versions of this manuscript. We also thank N.  
 572 Marti of the UT Division of Statistics and Scientific Computation, A. Kemp and C. Scarry for  
 573 statistical advice. Additionally, we are grateful to the Malagasy government and Madagascar  
 574 National Parks for permitting CCV to conduct this study. We are also grateful to MICET, ICTE,  
 575 and the staff at Centre ValBio and Kirindy Mitea for facilitating this project and the research  
 576 assistants who helped collect data: RAKOTOSOLOFO Andrianandrasanarivelo, Reziky  
 577 Clement, Birevotra Faharoy, Géorges RAZAFINDRAKOTO, AimeNoel NDRIATAHINA, Jean  
 578 Baptiste VELONTSARA.

580 **FUNDING**  
 581 Funding for the project was provided by The Leakey Foundation (to CCV), The Wenner-Gren  
 582 Foundation for Anthropological Research (7993 to CCV), The American Philosophical Society  
 583 (Lewis and Clark Fund for Exploration and Field Research to CCV) and The American Society  
 584 of Mammalogists (to CCV).

586 **REFERENCES**  
 587 **Ahnelt, P. K. and Kolb, H.** (2000). The mammalian photoreceptor mosaic-adaptive design.  
 588 *Prog. Retin. Eye Res.* **19**, 711-777.  
 589 **Baayen, R. H.** (2010). languageR: Data sets and functions with "Analyzing Linguistic Data: A  
 590 practical introduction to statistics." R package version 1.0. [http://CRAN.R-](http://CRAN.R-project.org/package=languageR)  
 591 [project.org/package=languageR](http://CRAN.R-project.org/package=languageR).  
 592 **Balko, E. A. and Underwood, B. H.** (2005). Effects of forest structure and composition on food  
 593 availability for *Varecia variegata* at Ranomafana National Park, Madagascar. *Am. J.*  
 594 *Primatol.* **66**, 45-70.  
 595 **Barlow, H. B., Levick, W. R. and Yoon, M.** (1971). Responses to single quanta of light in  
 596 retinal ganglion cells of the cat. *Vision Res.* **11**, 87-101.  
 597 **Bates, D. and Maechler, M.** (2010). lme4: Linear mixed-effects models using S4 classes. R  
 598 package version 0.999375-37. <http://CRAN.R-project.org/package=lme4>.

- 599 **Bidlingmayer, W. L.** (1964). The effect of moonlight on the flight activity of mosquitoes.  
600 *Ecology* **45**, 87-94.
- 601 **Bininda-Emonds, O. R. P., Cardillo, M., Jones, K. E., MacPhee, R. D. E., Beck, R. M. D.,**  
602 **Grenyer, R., Price, S. A., Vos, R. A., Glittleman, J. L. and Purvis A.** (2007). The delayed  
603 rise of present-day mammals. *Nature* **446**, 507-512.
- 604 **Bowmaker, J. K., Govardovskii, V. I., Shukolyukov, S. A., L.V. Zueva, J., Hunt, D. M.,**  
605 **Sideleva, V. G. and Smirnova, O. G.** (1994). Visual pigments and the photic environment:  
606 the cottoid fish of Lake Baikal. *Vision Res.* **34**, 591-605.
- 607 **Burgess, N. D., D'Amico Hales J., Underwood E. C., Dinerstein, E., Olson, D., Itoua, I.,**  
608 **Schipper, J., Ricketts, T. H. and Newman, K.** (2004). *Terrestrial Ecoregions of Africa and*  
609 *Madagascar: A Conservation Assessment*. Washington, DC: Island Press.
- 610 **Burnham, K. P. and Anderson D. R.** (2002). *Model Selection and Multimodel Inference*, 2nd  
611 edition. New York, NY: Springer.
- 612 **Burnham, K. P and Anderson, D. R.** (2004). Multimodel inference: understanding AIC and  
613 BIC in model selection. *Sociol. Methods Res.* **33**, 261-304.
- 614 **Burnham, K. P., Anderson, D. R. and Huyvaert K. P.** (2011). AIC model selection and  
615 multimodel inference in behavioral ecology: some background, observations, and  
616 comparisons. *Behav. Ecol. Sociobiol.* **65**, 23-25.
- 617 **Chiao, C. C., Vorobyev, M., Cronin T. W. and Osorio, D.** (2000). Spectral tuning of  
618 dichromats to natural scenes. *Vision Res.* **40**, 3257-3271.
- 619 **Condit, H. R. and Grum, F.** (1964). Spectral energy distribution of daylight. *J. Opt. Soc. Am.*  
620 **54**, 937-940.
- 621 **Cowing, J. A., Arrese, C. A., Davies, W. L., Beazley, L. D. and Hunt, D. M.** (2008). Cone  
622 visual pigments in two marsupial species: the fat-tailed dunnart (*Sminthopsis crassicaudata*)  
623 and the honey possum (*Tarsipes rostratus*). *Proc. R. Soc. Lond. B Biol. Sci.* **275**, 1491-1499.
- 624 **Cummings, M. E.** (2007). Sensory trade-offs predict signal divergence in surfperch. *Evolution*  
625 **61**, 530-545.
- 626 **Cummings, M. E.** (2004). Modelling divergence in luminance and chromatic detection  
627 performance across measured divergence in surfperch (Embiotocidae) habitats. *Vision Res.*  
628 **44**, 1127-1145.

- 629 **Cummings, M. E. and Partridge, J. C.** (2001). Visual pigments and optical habitats of  
630 surfperch (Embiotocidae) in the California kelp forest. *J. Comp. Physiol. A* **187**, 875-889.
- 631 **Cummings, M. E., Bernal, X. E., Reynaga, R., Rand, A. S. and Ryan, M. J.** (2008). Visual  
632 sensitivity to a conspicuous male cue varies by reproductive state in *Physalaemus*  
633 *pustulosus* females. *J. Exp. Biol.* **211**, 1203-1210.
- 634 **Endler, J. A.** (1990). On the measurement and classification of color in studies of animal color  
635 patterns. *Biol. J. Linn. Soc. Lond.* **41**, 315-352.
- 636 **Endler, J. A.** (1991). Variation in the appearance of guppy color patterns to guppies and their  
637 predators under different visual conditions. *Vision Res.* **31**, 587-608.
- 638 **Endler, J. A.** (1993). The color of light in forests and its implications. *Ecol. Monogr.* **63**, 2-27.
- 639 **Endler, J. A. and Thery, M.** (1996). Interacting effects of lek placement, display behaviour,  
640 ambient light, and color patterns in three Neotropical forest-dwelling birds. *Am. Nat.* **148**,  
641 421-452.
- 642 **Fietz, J. and Ganzhorn, J. U.** (1999). Feeding ecology of the hibernating primate *Cheirogaleus*  
643 *medius*: how does it get so fat? *Oecologia*, **121**, 157-164.
- 644 **Fleishman, L. J., Bowman, M., Saunders, D., Miller, W. E., Rury, M. J. and Loew, E. R.**  
645 (1997). The visual ecology of Puerto Rican anoline lizards: habitat light and spectral  
646 sensitivity. *J. Comp. Physiol. A* **181**, 446-460.
- 647 **Frazer, G.W., Canham, C.D. and Lertzman, K.P.** (1999). Gap Light Analyzer (GLA),  
648 Version 2.0: Imaging software to extract canopy structure and gap light transmission indices  
649 from true-color fisheye photographs, users manual and program documentation. Simon  
650 Fraser University, Burnaby, British Columbia, and the Institute of Ecosystem Studies,  
651 Millbrook, New York.
- 652 **Garland, T. and Ives A. R.** (2000). Using the past to predict the present: confidence intervals  
653 for regression equations in phylogenetic comparative methods. *Am. Nat.* **155**, 346-364.
- 654 **Gomez, D., Richardson, C., Lengagne, T., Plenet, S., Joly, P., Léna, J.-P. and Théry, M.**  
655 (2009). The role of nocturnal vision in mate choice: females prefer conspicuous males in the  
656 European tree frog (*Hyla arborea*). *Proc. R. Soc. Lond. B Biol. Sci.* **276**, 2351-2358.
- 657 **Gomez, D., Richardson, C., Lengagne, T., Derex, M., Plenet, S., Joly, P., Léna, J.-P. and**  
658 **Théry, M.** (2010). Support for a role of color vision in mate choice in the nocturnal  
659 European treefrog (*Hyla arborea*). *Behaviour* **147**, 1753-1768.

- 660 **Harmon, L. J., Weir, J. T., Brock, C. D., Glor, R. E. and Challenger, W.** (2008). GEIGER:  
661 investigating evolutionary radiations. *Bioinformatics* **24**, 129-131.
- 662 **Hunt, D. M., Carvalho, L. S., Cowing, J. A., and Davies, W. L.** (2009). Evolution and spectral  
663 tuning of visual pigments in birds and mammals. *Philos. Trans. R. Soc. Lond. B Biol. Sci.*  
664 **364**, 2941 -2955.
- 665 **Jacobs, G. H.** (2009). Evolution of colour vision in mammals. *Philos. Trans. R. Soc. B Biol. Sci.*  
666 **364**, 2957-2967.
- 667 **Jacobs, G. H. and Rowe, M. P.** (2004). Evolution of vertebrate colour vision. *Clin. Exp. Optom.*  
668 **87**, 206-216.
- 669 **Johnsen, S.** (2012). *The Optics of Life: A Biologist's Guide to Light in Nature*. Princeton, NJ:  
670 Princeton University Press.
- 671 **Johnsen, S., Kelber, A., Warrant, E., Sweeney, A. M., Widder, E. A., Lee, R. L. and**  
672 **Hernandez-Andres, J.** (2006). Crepuscular and nocturnal illumination and its effects on  
673 color perception by the nocturnal hawkmoth *Deilephila elpenor*. *J. Exp. Biol.* **209**, 789-800.
- 674 **Kamilar, J. M., Muldoon, K. M., Lehman, S. M. and Herrera, J. P.** (2012). Testing  
675 Bergmann's rule and the resource seasonality hypothesis in Malagasy primates using GIS-  
676 based climate data. *Am. J. Phys. Anthropol.* **147**, 401-408.
- 677 **Kawamura, S. and Kubotera, N.** (2004). Ancestral loss of short wave-sensitive cone visual  
678 pigment in loriform prosimians, contrasting with its strict conservation in other  
679 prosimians. *J. Mol. Evol.* **58**, 314-321.
- 680 **Kelber, A., Balkenius, A. and Warrant, E. J.** (2002). Scotopic color vision in nocturnal  
681 hawkmoths. *Nature* **419**, 922-925.
- 682 **Kelber, A., Balkenius, A. and Warrant, E. J.** (2003). Color vision in diurnal and nocturnal  
683 hawkmoths. *Int. Comp. Biol.* **43**, 571-579.
- 684 **Kelber, A. and Roth, L. S. V.** (2006). Nocturnal color vision □: not as rare as we might think. *J.*  
685 *Exp. Biol.* **209**, 781-788.
- 686 **Kelber, A. and Lind, O.** (2010). Limits of color vision in dim light. *Ophthalmic Physiol. Opt.*  
687 **30**, 454-459.
- 688 **Kelber, A. and Osorio, D.** (2010). From spectral information to animal color vision:  
689 experiments and concepts. *Proc. R. Soc. B Biol. Sci.* **277**, 1617-1625.

- 690 **Kieffer, H. H. and Stone T. C.** (2005). The spectral irradiance of the moon. *Astron. J.* **129**,  
691 2887-2901.
- 692 **Lane, A. P. and Irvine, W. M.** (1973). Monochromatic phase curves and albedos for the lunar  
693 disk. *Astron. J.* **78**, 267-277.
- 694 **Leal, M. and Fleishman, L. J.** (2002). Evidence for habitat partitioning based on adaptation to  
695 environmental light in a pair of sympatric lizard species. *Proc. R. Soc. Lond. B Biol. Sci.*  
696 **269**, 351-359.
- 697 **Lee, R. L., Jr and Hernández-Andrés, J.** (2003). Measuring and modeling twilight's purple  
698 light. *Appl. Opt.* **42**, 445-457.
- 699 **Levine, J. S. and MacNichol E. F.** (1979). Visual pigments in teleost fishes: effects of habitat,  
700 microhabitat, and behavior on visual system evolution. *Sens. Processes* **3**, 95-131.
- 701 **Lewis, R. J. and Bannar-Martin, K. H.** (2012). The impact of cyclone Fanele on a tropical dry  
702 forest in Madagascar. *Biotropica* **44**, 135-140.
- 703 **Lillywhite, P. G.** (1977). Single photon signals and transduction in an insect eye. *J. Comp.*  
704 *Physiol.* **122**, 189-200.
- 705 **Lukáts, A., Dkhissi-Benyahya, O., Szepessy, Z., Röhlich, P., Víg, B., Bennett, N. C.,**  
706 **Cooper, H. M., and Szél, A.** (2002). Visual pigment coexpression in all cones of two  
707 rodents, the Siberian hamster, and the pouched mouse. *Invest. Ophthalmol. Vis. Sci.* **43**,  
708 2468-2473.
- 709 **Lythgoe, J. N.** (1972). The adaptation of visual pigments to the photic environment. In  
710 *Handbook of Sensory Physiology Vol. VII/1: Photochemistry of Vision* (ed. H. J. A.  
711 Dartnall), pp. 566-603. New York: Springer-Verlag.
- 712 **Lythgoe, J. N.** (1979). *The Ecology of Vision*. Oxford: Clarendon Press.
- 713 **Lythgoe, J. N.** (1984). Visual pigments and environmental light. *Vision Res.* **24**, 1539-1550.
- 714 **Martin, G.** (1990). *Birds By Night*. London: Poyser.
- 715 **McFarland, W. N. and Munz, F. W.** (1975). Part III: the evolution of photopic visual pigments  
716 in fishes. *Vision Res.* **15**, 1071-1080.
- 717 **Melin, A. D., Moritze, G. L., Fosbury, R. A. E., Kawamura S. and Dominy N. J.** (2012).  
718 Why aye-eyes see blue. *Am. J. Primatol.* **74**, 185-192.



- 719 **Miller, S. D. and Turner R. E.** (2009). A dynamic lunar spectral irradiance data set for  
720 NPOESS/VIIRS day/night band nighttime environmental applications. *IEEE Trans. Geosci.*  
721 *Remote Sens.* **47**, 2316-2329.
- 722 **Mollon, J. D.** (1989). “Tho’ she kneel’d in that place where they grew...” The uses and origins  
723 of primate colour vision. *J. Exp. Biol.* **146**, 21-38.
- 724 **Müller, B., Glösmann, M., Peichl, L., Knop, G. C., Hagemann, C. and Ammermüller, J.**  
725 (2009). Bat eyes have ultraviolet-sensitive cone photoreceptors. *PLoS ONE*, **4**, e6390.
- 726 **Munz, F. W. and McFarland, W. N.** (1973). The significance of spectral position in the  
727 rhodopsins of tropical marine fishes. *Vision Res.* **13**, 1829-1874.
- 728 **Munz, F. W. and McFarland, W. N.** (1977). Evolutionary adaptations of fishes to the photic  
729 environment. In *The Visual System of Vertebrates* (ed. F. Crescitelli), pp. 194-274. New  
730 York: Springer-Verlag.
- 731 **Orme, D., Freckleton, R., Thomas, G., Petzoldt, T., Fritz, S. and Isaac, N.** (2010). caper:  
732 comparative analyses of phylogenetics and evolution in R. R package version 0.4/r71. see  
733 <http://www.R-Forge.R-project.org/projects/caper/>.
- 734 **Osorio, D. and Vorobyev, M.** (2005). Photoreceptor spectral sensitivities in terrestrial animals:  
735 adaptations for luminance and colour vision. *Proc. R. Soc. Lond. B Biol. Sci.* **272**, 1745-  
736 1752.
- 737 **Pagel, M.** (1999). Inferring the historical patterns of biological evolution. *Nature* **401**, 877-884.
- 738 **Paradis, E., Claude, J. and Strimmer, K.** (2004). APE: analyses of phylogenetics and  
739 evolution in R language. *Bioinformatics* **20**, 287-290.
- 740 **Pariante, G. F.** (1980). Quantitative and qualitative study of the light available in the natural  
741 biotope of Malagasy prosimians. In *Nocturnal Malagasy Primates: Ecology, Physiology,*  
742 *and Behaviour* (eds. P. Charles-Dominique, H. M. Cooper, A. Hladik, C. M. Hladik, G. F.  
743 Pariante, A. Petter-Rousseaux, and A. Schilling), pp. 117-134.
- 744 **Partridge, J. C. and Cummings, M. E.** (1999). Adaptation of visual pigments to the aquatic  
745 environment. In *Adaptive Mechanisms in the Ecology of Vision* (eds S. N. Archer, M. B. A.  
746 Djamgoz, E. R. Loew, J. C. Partridge and S. Vallergera), pp. 251-283. Boston: Kluwer  
747 Academic Publishers.

- 748 **Perry, G. H., Martin, R. D. and Verrelli, B. C.** (2007). Signatures of functional constraint at  
749 aye-aye opsin genes: the potential of adaptive color vision in a nocturnal primate. *Mol. Biol.*  
750 *Evol.* **24**, 1963-1970.
- 751 **R Development Core Team** (2011). R: A language and environment for statistical computing. R  
752 Foundation for Statistical Computing, Vienna, Austria. ISBN 3-900051-07-0, URL  
753 <http://www.R-project.org/>.
- 754 **Roth, L. S. V. and Kelber, A.** (2004). Nocturnal color vision in geckos. *Proc. R. Soc. Lond. B*  
755 *Biol. Sci.* **271**, S485-S487.
- 756 **Shaw, J. A.** (2005). The digital blue sky at night. *Opt. Photonics News* **16**, 18-23.
- 757 **Somanathan, H., Borges, R. M., Warrant, E. J. and Kelber, A.** (2008). Nocturnal bees learn  
758 landmark colors in starlight. *Curr. Biol.* **18**, R996-R997.
- 759 **Sorg, J.-P. and Rohner, U.** (1996). Climate and tree phenology of the dry deciduous forest of  
760 the Kirindy Forest. *Primate Report* **46-1**, 57-80.
- 761 **Sumner, P. and Mollon, J. D.** (2000). Catarrhine photopigments are optimized for detecting  
762 targets against a foliage background. *J. Exp. Biol.* **203**, 1963-1986.
- 763 **Sweeney, A. M., Boch, C. A., Johnsen, S. and Morse, D. E.** (2011). Twilight spectral  
764 dynamics and the coral reef invertebrate spawning response. *J. Exp. Biol.* **214**, 770-777.
- 765 **Symonds M. R. E. and Moussalli A.** (2011). A brief guide to model selection, multimodel  
766 inference and model averaging in behavioural ecology using Akaike's information criterion.  
767 *Behav. Ecol. Sociobiol.* **65**, 13-21.
- 768 **Théry, M.** (2001). Forest light and its influence on habitat selection. *Plant Ecol.* **153**, 251-261.
- 769 **Umino, Y., Solessio, E. and Barlow R. B.** (2008). Speed, spatial, and temporal tuning of rod  
770 and cone vision in mouse. *J. Neurosci.* **28**, 189-198.
- 771 **United States Navy** (1952). Natural Illumination Charts. United States Navy Research and  
772 Development project NS 714-100. Report No. 374-1 (September).
- 773 **United States Naval Observatory** (2011). Complete sun and moon data for one day.  
774 *Astronomical Applications Department, United States Navy*,  
775 [http://aa.usno.navy.mil/data/docs/RS\\_OneDay.php](http://aa.usno.navy.mil/data/docs/RS_OneDay.php) (November 27, 2011).
- 776 **Walls, G. L.** (1942). *The Vertebrate Eye and Its Adaptive Radiation*. Bloomfield Hills,  
777 Michigan: The Cranbrook Press.

- 778 **Wang, D., Oakley, T., Mower, J., Shimmin, L. C., Yim, S., Honeycutt, R. L., Tsao, H. and**  
 779 **Li, W.-H.** (2004). Molecular evolution of bat color vision genes. *Mol. Biol. Evol.* **21**, 295-  
 780 302.
- 781 **Warrant, E. J.** (2004). Vision in the dimmest habitats on Earth. *J. Comp. Physiol. A* **190**, 765-  
 782 789.
- 783 **Warrant, E. J.** (2008). Nocturnal vision. In *The Senses: A Comprehensive Reference Vol. 2:*  
 784 *Vision II* (eds. T. Albright, and R. H. Masland), pp. 53-86. Oxford: Academic Press.
- 785 **Wright, P. C.** (1992). Primate ecology, rainforest conservation, and economic development:  
 786 building a national park in Madagascar. *Evol. Anthropol.* **1**, 25-33.
- 787 **Young, R. E. and Mencher F., M.** (1980). Bioluminescence in mesopelagic squid: diel color  
 788 change during counterillumination. *Science* **208**, 1286-1288.
- 789 **Zhao, H., Rossiter, S. J., Teeling, E. C., Li, C., Cotton, J. A. and Zhang, S.** (2009a). The  
 790 evolution of color vision in nocturnal mammals. *Proc. Natl. Acad. Sci. U S A* **106**, 8980-  
 791 8985.
- 792 **Zhao, H., Xu, D., Zhou, Y., Flanders, J. and Zhang, S.** (2009b). Evolution of opsin genes  
 793 reveals a functional role of vision in the echolocating little brown bat (*Myotis lucifugus*).  
 794 *Biochem. Syst. Ecol.* **37**, 154-161.
- 795 **Zuur, A. F., Ieno, E. N., Walker, N. J., Saveliev, A. A. and Smith, G. M.** (2009). *Mixed*  
 796 *Effects Models and Extensions in Ecology with R*. New York: Springer.

## 798 FIGURE LEGENDS

799 **Fig. 1.** Lunar phase and nocturnal irradiance spectra from the seasonally dry deciduous  
 800 forest/woodland at Anko during the dry season (July-September, 2009). Points indicate mean  
 801 irradiance values (**A, B**) or mean normalized values (**C**) for each narrow bandpass interference  
 802 filter and bars indicate standard error. (**A**) and (**B**) Irradiance spectra in clear night sky at Anko  
 803 for all lunar altitudes. (**B**) Subset of data (crescent and no moon) from **A** at a lower range of Y-  
 804 axis values. Data for **A** and **B**: full moon ( $n=117$ ), gibbous moon ( $n=39$ ), quarter moon ( $n=20$ ),  
 805 crescent moon ( $n=8$ ), and no moon ( $n=105$ ). (**C**) Mean and standard deviation of normalized  
 806 nocturnal irradiance spectra by lunar phase with the moon at 30-59.9° altitude in clear sky. Data:  
 807 full moon ( $n=68$ ), quarter moon ( $n=15$ ), no moon present ( $n=105$ ).

808

809 **Fig. 2.** Effects of lunar altitude and nocturnal irradiance spectra at Anko under full moonlight in  
 810 clear sky. Points indicate mean irradiance values (**A**) or mean normalized values (**B**) for each  
 811 narrow bandpass interference filter and bars indicate standard error. (**A**) Log-transformed  
 812 irradiance spectra at different lunar altitudes. (**B**) Effects of lunar altitude on normalized  
 813 nocturnal spectra. Data: 0-29.9° ( $n=14$ ), 30-59.9° ( $n=68$ ), 60-90° ( $n=35$ ).

814

815 **Fig. 3.** Effects of canopy openness on nocturnal irradiance spectra at Anko under full moonlight  
 816 and starlight in clear sky. Points indicate mean irradiance values (**A-C**) or mean normalized  
 817 values (**D-E**) for each narrow bandpass interference filter and bars indicate standard error. (**A**)  
 818 and (**D**) Effects of canopy openness on nocturnal irradiance in full moonlight at higher lunar  
 819 altitudes ( $>45^\circ$ ) for absolute and normalized irradiance, respectively. Data:  $<30\%$  ( $n=8$ ), 30-  
 820 44.9% ( $n=47$ ), 45%+ ( $n=10$ ). (**B**) and (**E**) Effects of canopy openness on nocturnal irradiance in  
 821 full moonlight at lower lunar altitudes ( $<45^\circ$ ) for absolute and normalized irradiance,  
 822 respectively. Data:  $<30\%$  ( $n=8$ ), 30-45% ( $n=29$ ), 45%+ ( $n=10$ ). (**C**) and (**F**) Effects of canopy  
 823 openness on nocturnal irradiance when no moon was present for absolute and normalized  
 824 irradiance, respectively. Data:  $<30\%$  ( $n=8$ ), 30-39% ( $n=53$ ), 40%+ ( $n=38$ ).

825

826 **Fig. 4.** Predicted and observed values ( $n=242$ ) for absolute total flux and relative flux by  
 827 different bandwidths (%SW: 400-460 nm; %MW: 490-540 nm; %LW: 560-680 nm) based on  
 828 best-fit linear mixed models. Correlation coefficient, degrees of freedom, and  $p$ -values provided  
 829 for predicted vs. observed values from the Anko dry forest dataset (black circles). Dashed line in  
 830 each panel depicts expectations under a one-to-one relationship (slope=1, intercept=0) between  
 831 predicted and observed values. Red stars are predicted and observed values for rainforest data fit  
 832 to the dry forest linear model. Model parameters, including slopes and intercepts, are provided in  
 833 Table S3, and equations in text. (**A**) Log total flux, (**B**) %SW (400-460 nm), (**C**) %MW (490-540  
 834 nm) and (**D**) %LW (560-680 nm).

835

836 **Fig. 5.** Nocturnal irradiance comparisons between the dry forest at Anko and the rainforest at  
 837 Valo and Tala. Comparative Anko spectra were only available from more open canopy  
 838 microhabitats ( $>37\%$  canopy openness). Points indicate mean irradiance values (**A**, **B**) or  
 839 normalized values (**C**, **D**) for each narrow bandpass interference filter and bars indicate standard

840 error. (A) and (C) Nocturnal light in crescent moonlight (lunar altitude 6.4-28.5°) in clear sky at  
841 Valo ( $n=8$ ) and Anko ( $n=8$ ) for absolute and normalized irradiance, respectively. (B) and (D)  
842 Nocturnal light in gibbous moonlight (lunar altitude 30.4-56°) in cloudy sky at Tala ( $n=6$ ) and  
843 Anko ( $n=14$ ) for absolute and normalized irradiance, respectively.

844

845 **Fig. 6.** Visual pigment peak spectral sensitivity in (A) nocturnal mammals and (B) other  
846 nocturnal vertebrates based on published data (Table S1). For (A), mammal species in bold and  
847 with shaded lines are fruit/flower consumers. Closed circles=SWS cones, asterisks=rods, open  
848 circles=LWS cones. Solid lines represent loss of SWS cones.

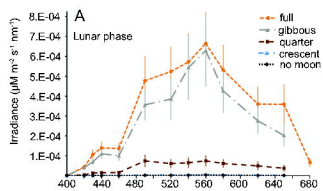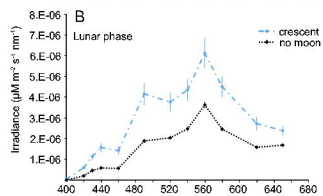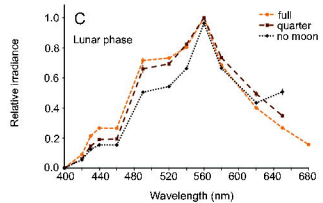

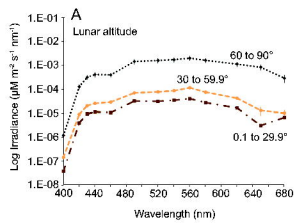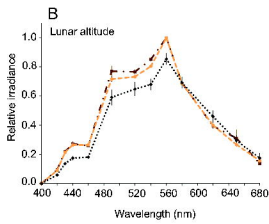

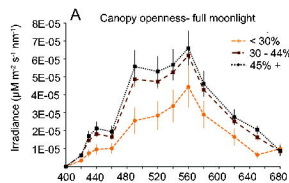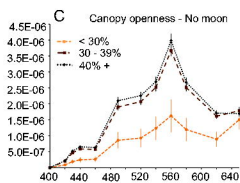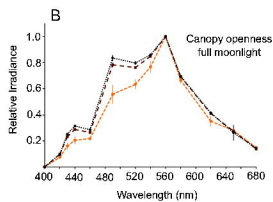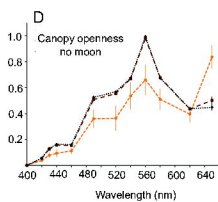



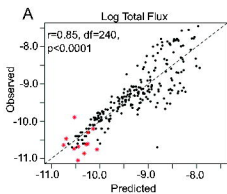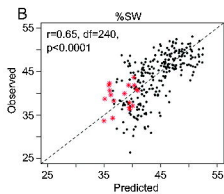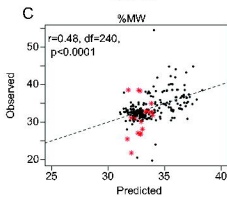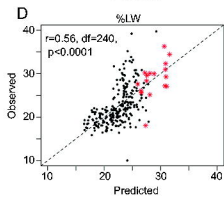

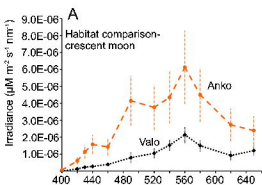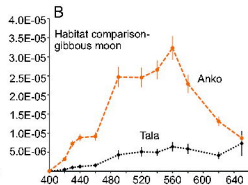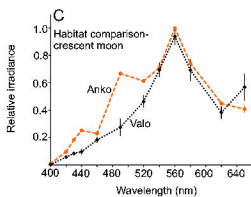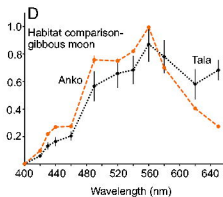

A

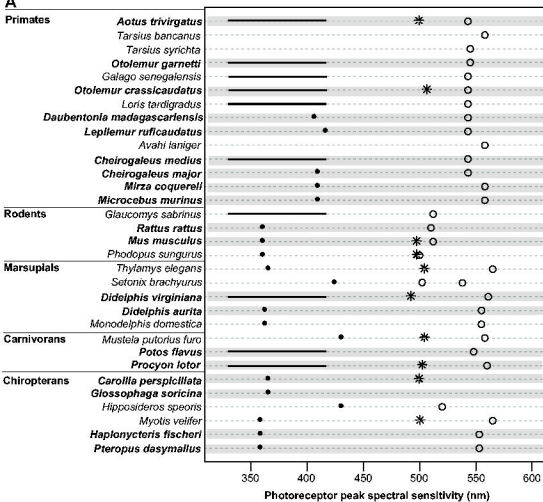

B

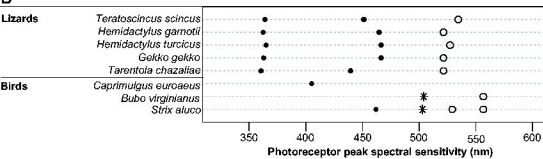

**Table 1.** Factor weights for linear mixed models.

| <b>Factor</b>             | <b>Log Total Flux</b> | <b>%SW</b> | <b>%MW</b> | <b>%LW</b> |
|---------------------------|-----------------------|------------|------------|------------|
| Altitude                  | 1.0000                | 1.0000     | 1.0000     | 1.0000     |
| Phase                     | 1.0000                | 1.0000     | 0.9960     | 1.0000     |
| Canopy                    | 0.9891                | 0.9998     | 0.7772     | 0.9998     |
| Altitude * Phase          | 0.3695                | 1.0000     | 0.5899     | 1.0000     |
| Altitude * Canopy         | 0.2811                | 0.9993     | 0.5073     | 0.9978     |
| Phase * Canopy            | 0.3222                | 0.1193     | 0.6099     | 0.5002     |
| Altitude * Phase * Canopy | 0.0222                | 0.1191     | 0.3743     | 0.4989     |

Factor weight reflects probability that factor is present in the best model.

Notes: Altitude = cosine lunar altitude, Phase = lunar phase function, Canopy = fraction canopy openness. Spectral bandwidths: %SW (400-460 nm), %MW (490-540 nm), %LW (560-680 nm).

**Table 2.** Results of PGLS for effects of diet and habitat type on cone pigment spectral tuning.

|                                | <b>Slope</b>  | <b>F-statistic (df)</b> | <b>p-value</b> | <b>r<sup>2</sup></b> | <b>Pagel's Lambda</b> |
|--------------------------------|---------------|-------------------------|----------------|----------------------|-----------------------|
| <u>SWS</u>                     |               |                         |                |                      |                       |
| <b>Fruit/flowers (13Y, 4N)</b> | <b>-40.08</b> | <b>9.934 (2,15)</b>     | <b>0.002</b>   | <b>0.398</b>         | <b>1.00</b>           |
| Habitat (7 open, 3 closed)     | 6.014         | 0.246 (2,8)             | 0.788          | 0.030                | 1.00                  |
| <u>LWS</u>                     |               |                         |                |                      |                       |
| Fruit/flowers (18Y, 11N)       | 3.131         | 0.250 (2,27)            | 0.781          | 0.009                | 0.72                  |
| Habitat (8 open, 8 closed)     | 2.375         | 0.412 (2,14)            | 0.670          | 0.029                | 0.00                  |

Bold represents significant effect. Sample sizes for each analysis in parentheses.

Fruit/flowers = whether fruit or flower products are >10% of a species' diet.

Habitat = open canopy woodland/forest vs. closed canopy forest
